# Supplementary material for: Rare earth-incorporated cobalt ferrite anchored on reduced graphene oxide nanocomposites with enhanced peroxydisulfate photocatalytic degradation of bisphenol A in aqueous solution
Source: Research Square preprint supplement (doi:10.21203/rs.3.rs-8564521/v1), 2026-01-14
Supplement: Supplementary file 1 [file f1d7f52ca229c8269a82808d.docx]

**SUPPLEMENTARY INFORMATION:**

**Nanotechnology for Environmental Engineering:**

**Samarium-incorporated cobalt ferrite anchored on reduced graphene oxide nanocomposites with enhanced peroxydisulfate photocatalytic degradation of Bisphenol A in aqueous solution**

C. Donga a, K. Yokwanaa, L. L. Notoa N. T. Mojab and P. S. Mbule a

aDepartment of Physics, CSET. University of South Africa. Johannesburg, 1710. South Africa.

b Institute for Nanotechnology and Water Sustainability, College of Science, Engineering and Technology, University of South Africa, Florida Campus, Johannesburg, South Africa

*Corresponding author, E-mail address: dongac@unisa.ac.za

**Fig. S1**. EDS of CoFe2O4.

**Fig. S2**. EDS of SmCoFe2O4. UV-Vis DRS

Fig. S3. Effect of pH on the % degradation of BPA.

Fig. S4. Effect of scavenger on the % degradation of BPA.
